# Supplementary material
Source: Royal Society of Chemistry journal article supplement (doi:10.1039/d6ma00413j)
Supplement: d6ma00413j1.pdf [file d6ma00413j1.pdf]

## Dissolved Oil and Mercury (II) Adsorption under Dynamic Conditions

### by Thiol-Terminated COF Modified Sponges

Panagiota Bika<sup>a</sup>, Nadia Todorova<sup>a</sup>, Theopisti Lympelopoulou<sup>b</sup>, Lamprini-Areti Tsakanika<sup>b</sup>, Maria-Anna Gatou<sup>b</sup>, Elias Sakellis<sup>a,c</sup>, Nikolaos Zacharopoulos<sup>a</sup>, Vasileios Psycharis<sup>a</sup>, Apostolos Kalafatis<sup>a</sup>, Thomas Stergiopoulos<sup>a</sup>, Dimitrios Tsoukleris<sup>d</sup>, Evangelia A. Pavlatou<sup>b</sup> and Panagiotis Dallas<sup>a,e</sup>

<sup>a</sup> *Institute of Nanoscience and Nanotechnology, NCSR Demokritos, 15341, Athens, Greece* <sup>b</sup> *Laboratory of General Chemistry, School of Chemical Engineering, National Technical University of Athens, Zografou Campus, 15772, Athens, Greece* <sup>c</sup> *Department of Physics, National and Kapodistrian University of Athens, Athens, Greece* <sup>d</sup> *NanoViis Innovative Nanotechnologies 21 El. Venizelou Str., Melissia, Athens, Greece, 15127* <sup>e</sup> *Theoretical and Physical Chemistry Institute, National Hellenic Research Foundation, 11635, Athens, Greece*

- [pdallas@eie.gr](mailto:pdallas@eie.gr); [p.dallas@inn.demokritos.gr](mailto:p.dallas@inn.demokritos.gr) Phone: +302107273812

**Highlights.** Covalent organic frameworks, melamine sponge, heavy metal adsorption, crude oil, oil-in-water emulsion, mercury removal

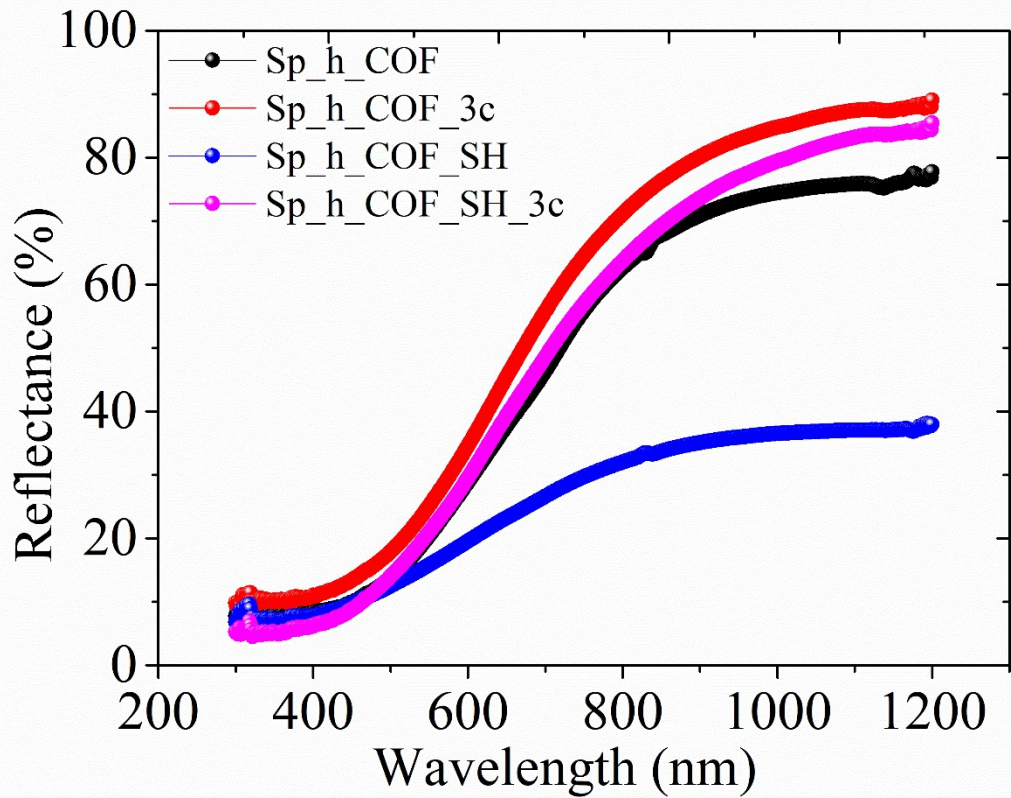

**Figure S1.** Diffuse reflectance spectra of three samples, Sp\_h\_COF; Sp\_h\_COF\_3c; Sp\_h\_COF\_SH and Sp\_h\_COF\_SH\_3c

| Element        | Weight % |        | Atomic % |       |
|----------------|----------|--------|----------|-------|
|                | Before   | After  | Before   | After |
| Carbon         | 62.69    | 65.49  | 75.395   | 75.33 |
| Nitrogen       | 10.65    | 15.355 | 10.68    | 15.12 |
| Oxygen         | 6.18     | 6.095  | 5.58     | 5.25  |
| Silicon        | 2.7      | 1.26   | 1.385    | 0.62  |
| Gold (coating) | 3.145    | 3.92   | 0.24     | 0.285 |
| Sulfur         | 14.915   | 7.88   | 6.725    | 3.395 |
| Total          | 99.995   | 100    | 100.005  | 100   |

**Table S1.** Quantitative analysis of the EDS spectra of the thiol modified sponges before (Sp\_h\_COF\_SH) and after (Sp\_h\_COF\_SH\_3c) the oil removal and subsequent recovery

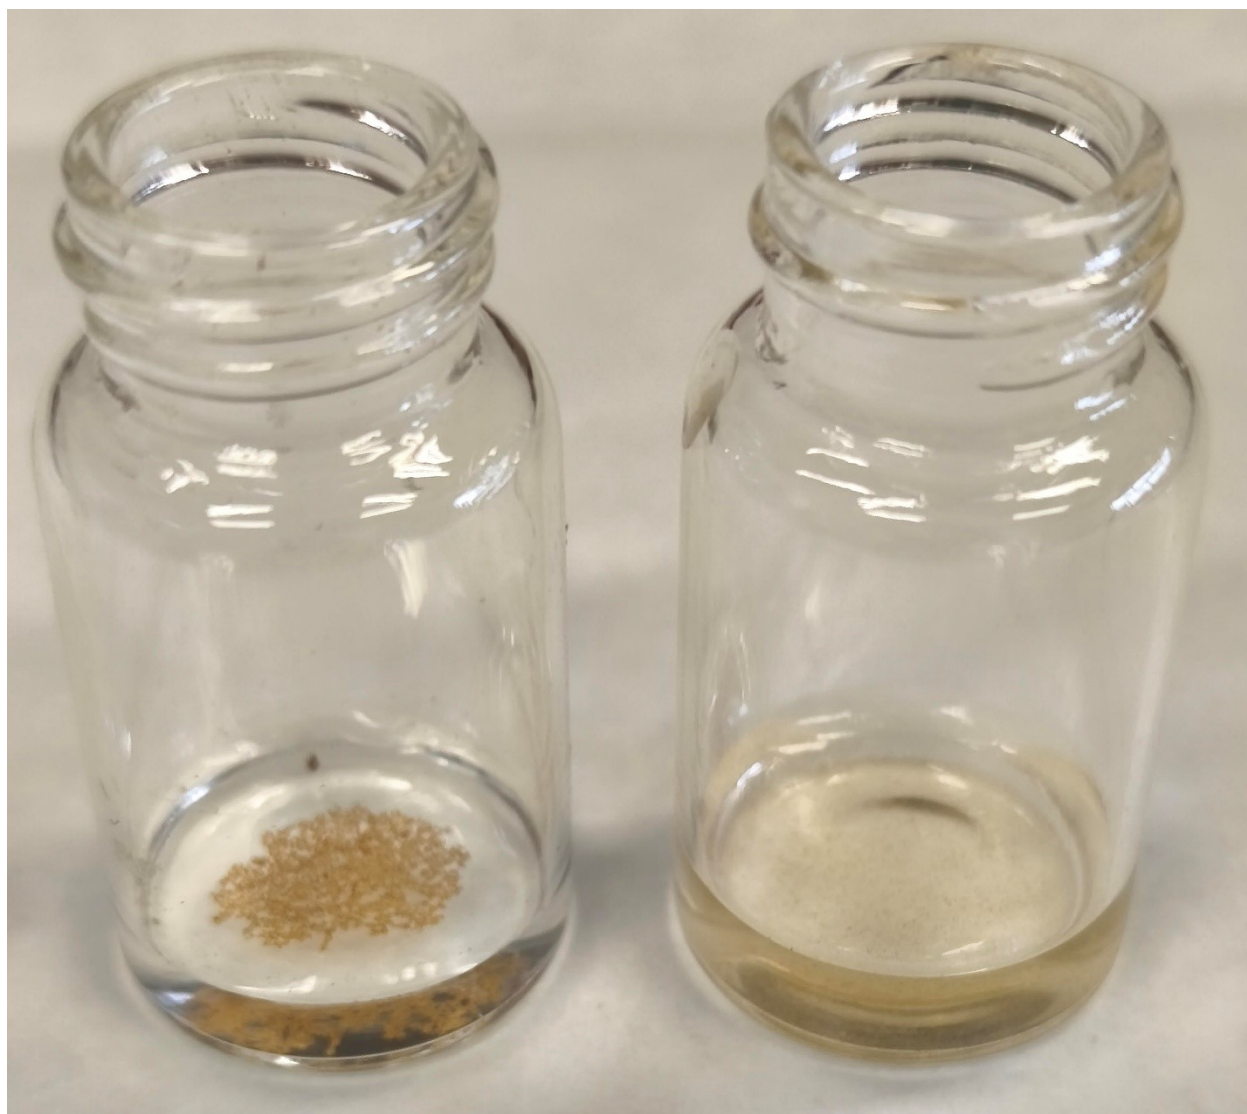

**Figure S2.** The powders removed from the Sp\_h\_CO<sub>F</sub>\_3c and the Sp\_h\_CO<sub>F</sub>\_SH samples are added in water.

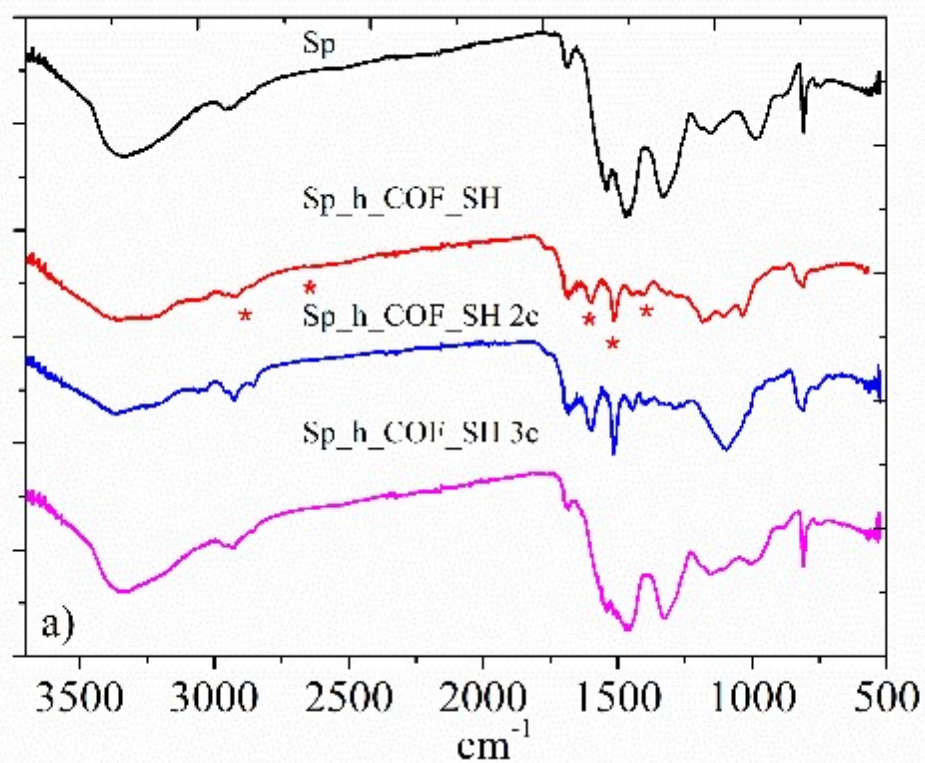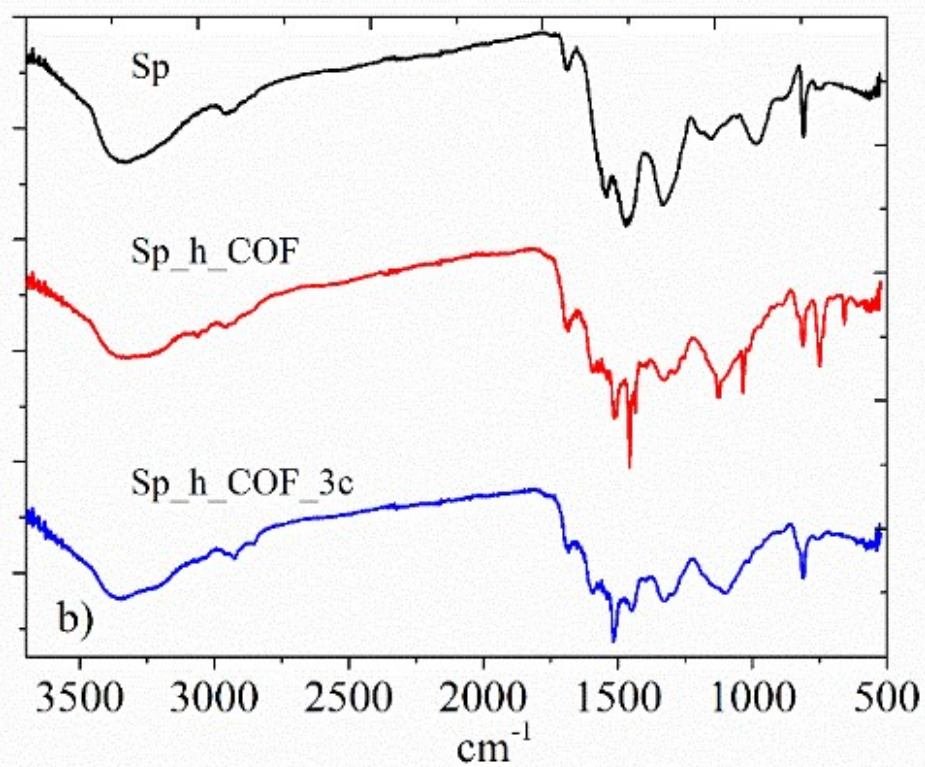

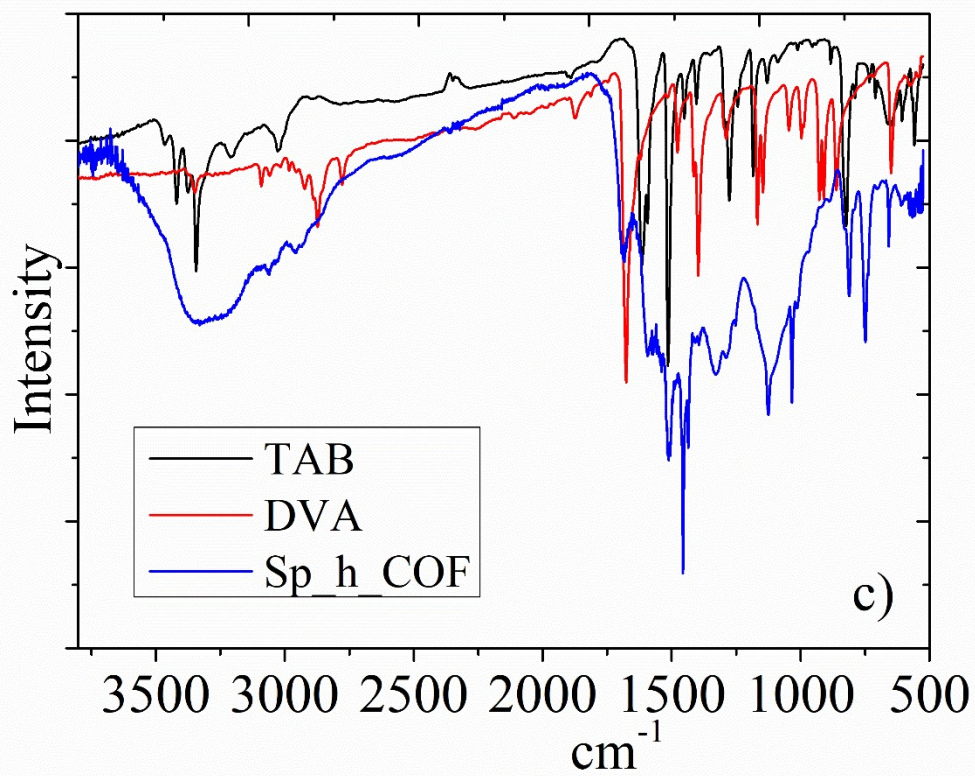

**Figure S3.** FTIR spectra of a) Sp; Sp\_h\_COF\_SH; Sp\_h\_COF\_SH\_2c; Sp\_h\_COF\_SH\_3c b) Sp; Sp\_h\_COF; Sp\_h\_COF\_3c c) The spectra of TAB and DVA precursors in comparison with the Sp\_h\_COF sample

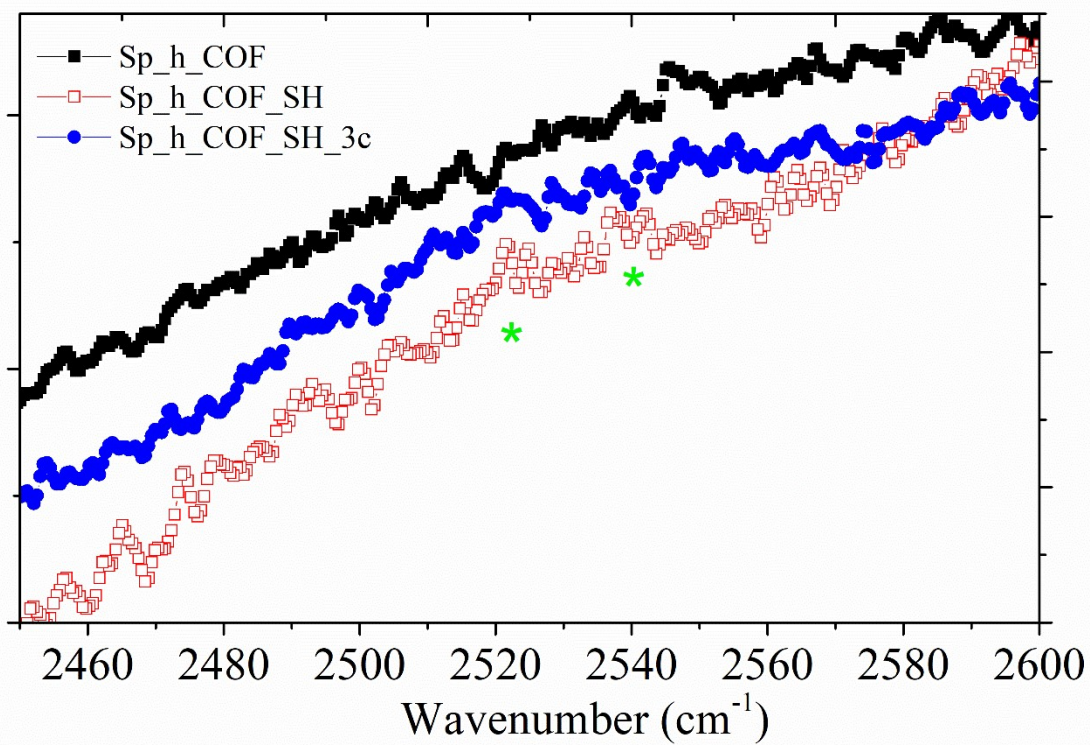

**Figure S4.** FTIR spectra focusing on the S-H region. The peaks indicating the S-H group are indicated with green stars

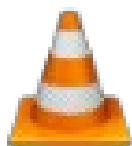

VID\_20251117\_105341.mp4

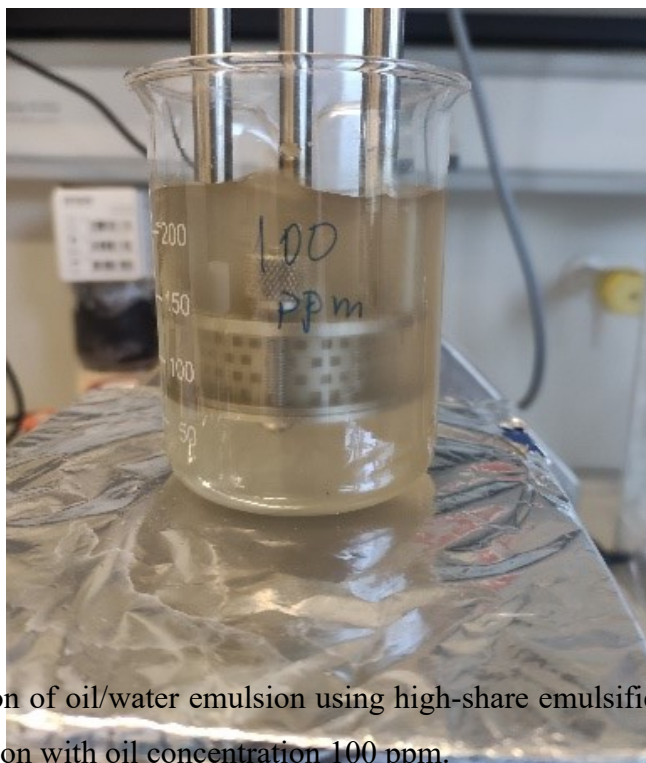

**Figure S5.** Preparation of oil/water emulsion using high-shear emulsifier: video (a) and photo (b) of the final emulsion with oil concentration 100 ppm.

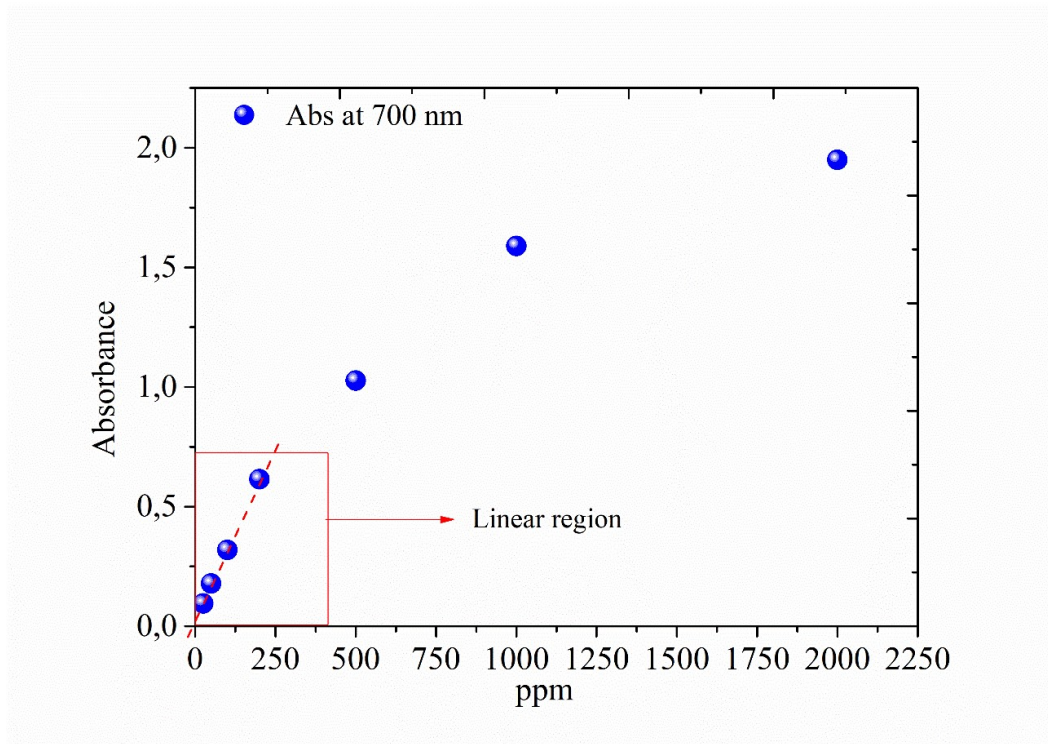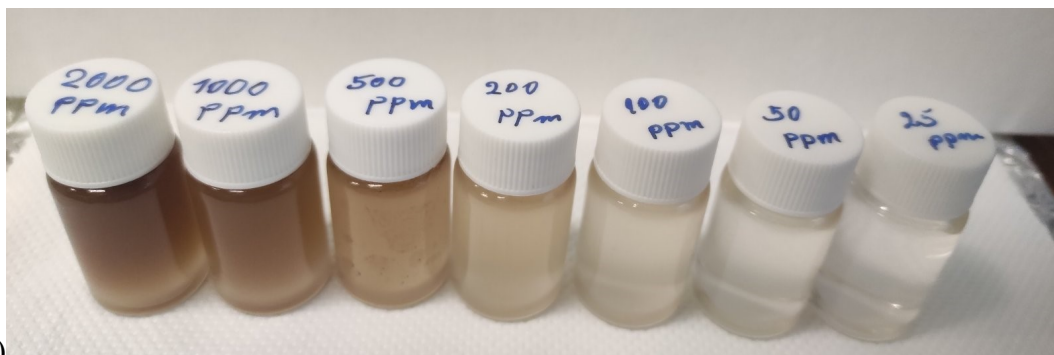

b)

**Figure S6.** a) The intensity of the absorbance at 700 nm for different oil concentrations b) Image of the oil-in-water emulsions from 25 to 2000 ppm

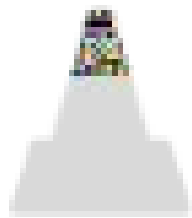

## Sp\_h\_COF\_SH video.mp4

**Figure S7.** Video of the Sp\_h\_COF\_SH during the first oil-in-water adsorption cycle

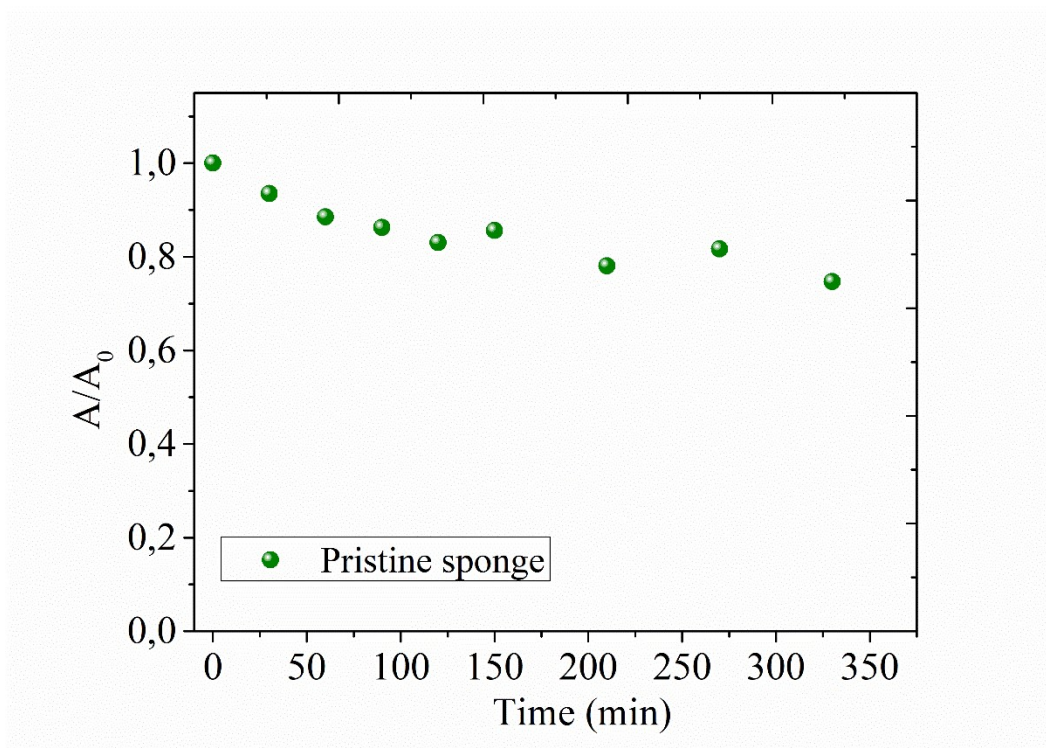

**Figure S8.** The oil adsorption behavior of the pristine sponge. A is the absorbance of aliquots in different time intervals and A<sub>0</sub> the absorbance of the initial emulsion before the addition of the sponge

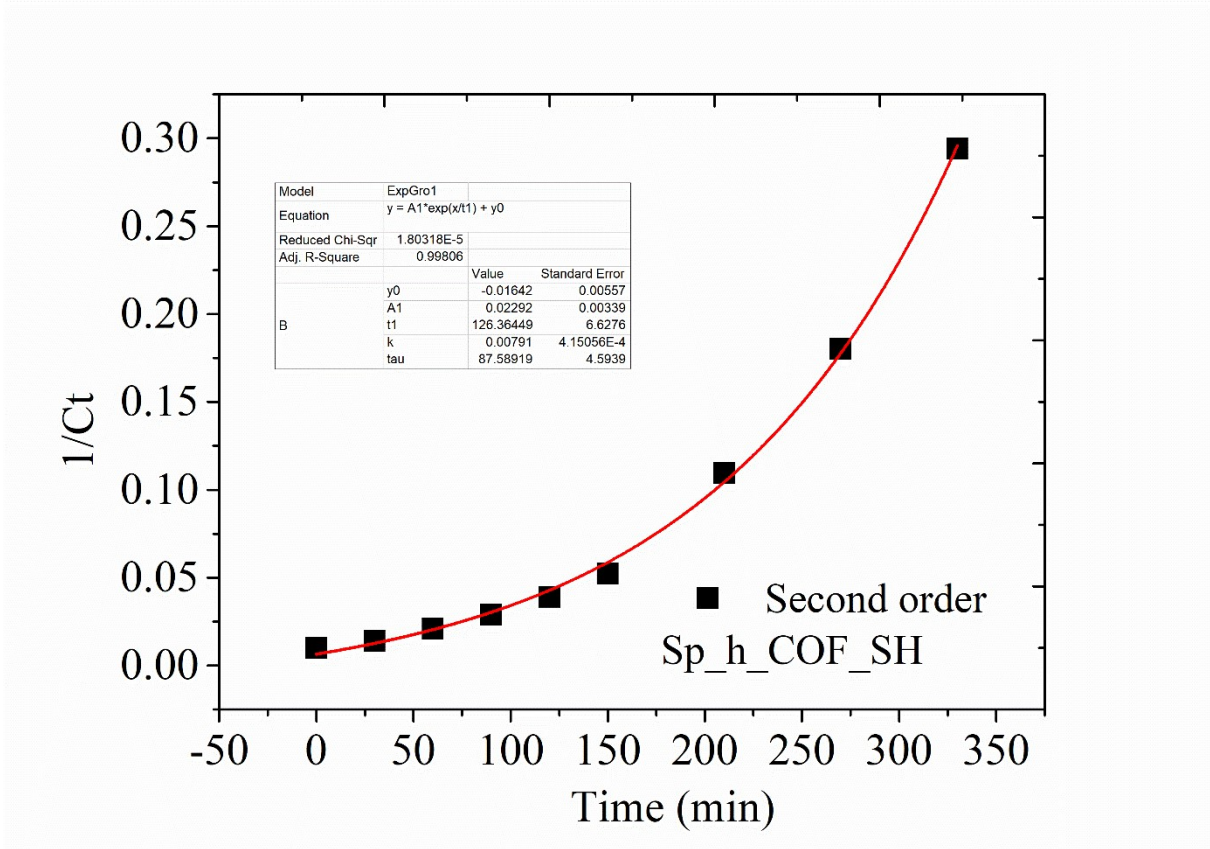

**Figure S9.** Second order kinetic fitting for the Sp\_h\_COF\_SH oil adsorption

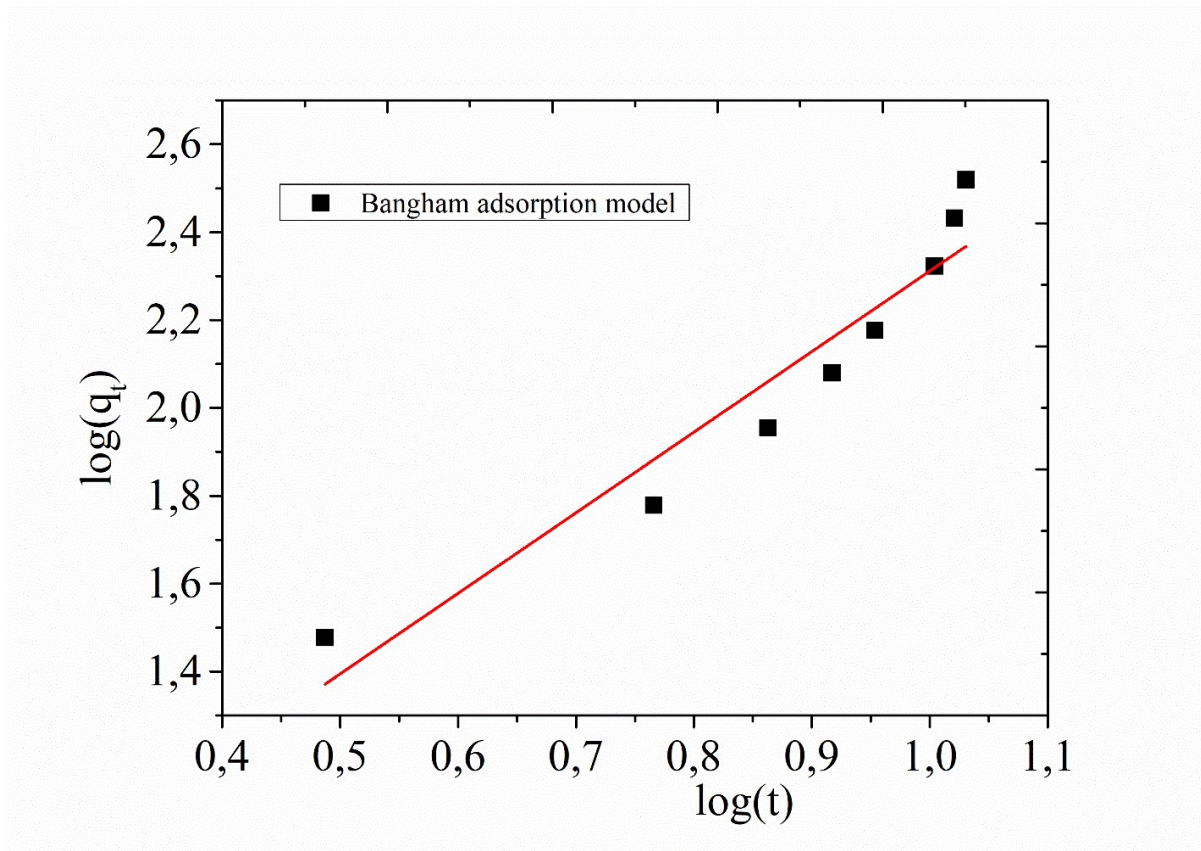

**Figure S10.** Bangham model fitting curve for the first oil adsorption cycle of the Sp\_h\_COF\_SH sample

| Element         | %     |       |
|-----------------|-------|-------|
|                 | Wt    | At    |
| <b>Carbon</b>   | 44.89 | 63.53 |
| <b>Nitrogen</b> | 5.01  | 6.08  |
| <b>Oxygen</b>   | 16.66 | 17.71 |
| <b>Silicon</b>  | 9.97  | 6.04  |
| <b>Sulfur</b>   | 8.08  | 4.29  |
| <b>Mercury</b>  | 15.39 | 2.36  |

**Table S2.** Quantitative analysis of the EDS spectra of the thiol modified sponges before (Sp\_h\_COF\_SH) after the dynamic mercury adsorption
